# Supplementary material for: Dissociation of O2 and its reactivity on O/S doped graphene
Source: Royal Society of Chemistry journal article supplement (doi:10.1039/c5ra16789b), 2015-12-28
Supplement: c5ra16789b1.pdf [file c5ra16789b1.pdf]

## SUPPORTING INFORMATION

### Dissociation of O<sub>2</sub> and Its Reactivity on O/S doped Graphene

Meiling Hou<sup>1</sup>, Wanglai Cen<sup>2,3\*</sup>, Fang Nan<sup>4</sup>, Jianjun Li<sup>1,3</sup>, Yinghao Chu<sup>1,3\*</sup>, Huaqiang Yin<sup>1,3</sup>

1. College of Architecture and Environment, Sichuan University, Chengdu, 610065, P. R. China;
2. Institute of New Energy and Low Carbon Technology, Sichuan University, Chengdu, 610065, P. R. China;
3. National Engineering Research Center for Flue Gas Desulfurization, Chengdu, 610065, P. R. China;
4. Sichuan Electric Design and Consulting Company, Chengdu, 610094, P. R. China.

Corresponding Author:

Dr. Wanglai Cen (cenwanglai@163.com)

Dr. Yinghao Chu(chuyinghao@scu.edu.cn)

Tel/Fax: +86 28 85403016

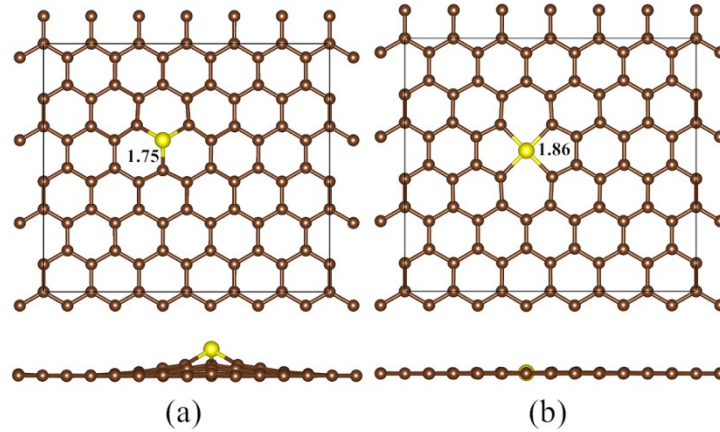

Figure S1 Geometric structures of SG in different doping mode. (a): S atom replaced one C atom (SG1); (b): S atom replaced two C atoms (SG2). Yellow and brown spheres denote S and C atoms, respectively. The length of C-S bonds were given in Å.

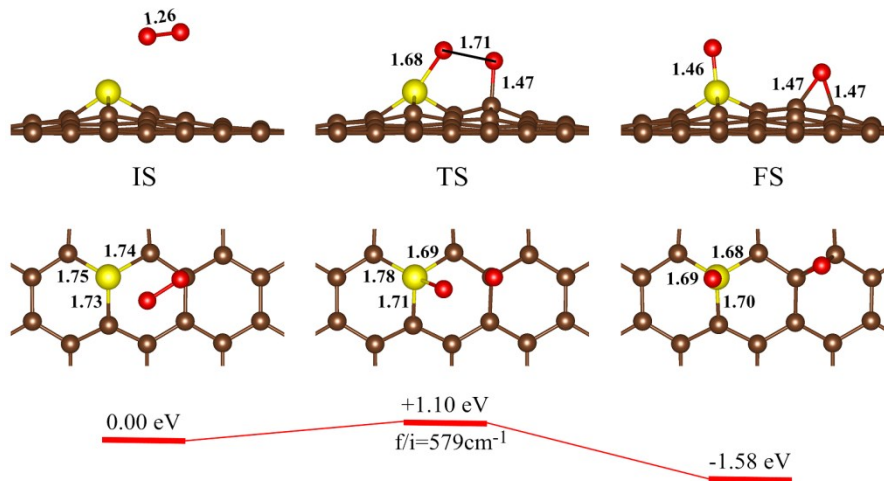

Figure S2 Minimum energy pathway (MEP) for the dissociation of  $O_2$  on SG1. All the lengths are given in Å. It denotes that the dissociation of  $O_2$  on SG1 is not kinetically preferable.

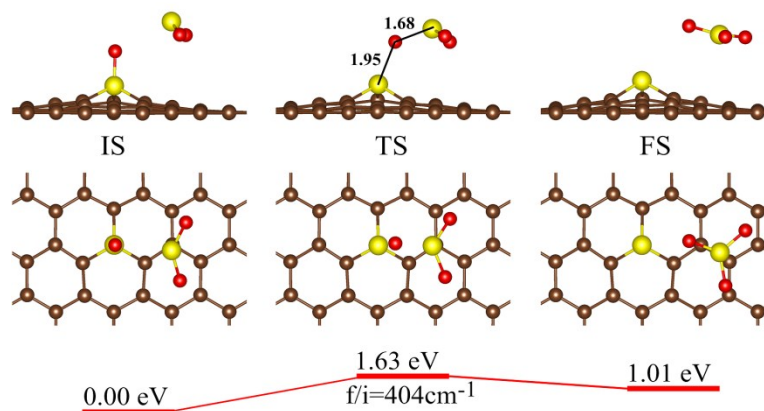

Figure S3 Oxidation of  $SO_2$  on SG1. It denotes that the oxidation is not kinetically and thermodynamically preferable.

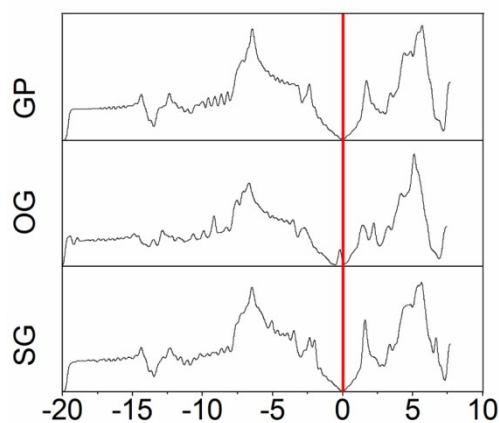

Figure S4 Density of states (DOS) analysis for different surfaces.

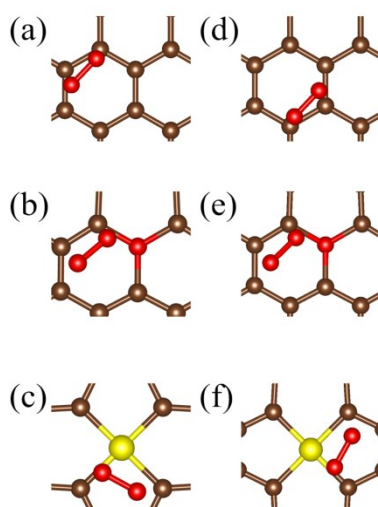

Figure S5 Top view of adsorption configurations of  $O_2$  on GP, OG and SG surfaces. Spin polarization was ignored in (a)-(c), while it was included for (d)-(f). All the distances are given in Å.

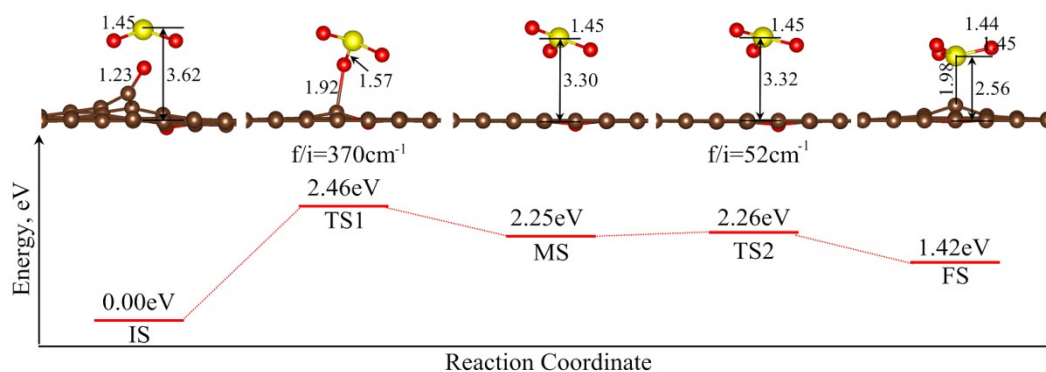

Figure S6 Minimum energy pathway (MEP) for the oxidation of  $SO_2$  by  $1O_{OG}$ . All the lengths are given in Å.

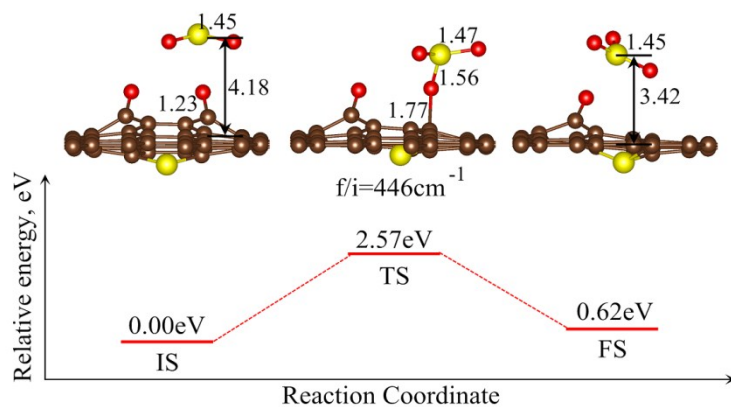

Figure S7 Minimum energy pathway (MEP) for the oxidation of SO<sub>2</sub> by 2O<sub>SG</sub>. All the lengths are given in Å.

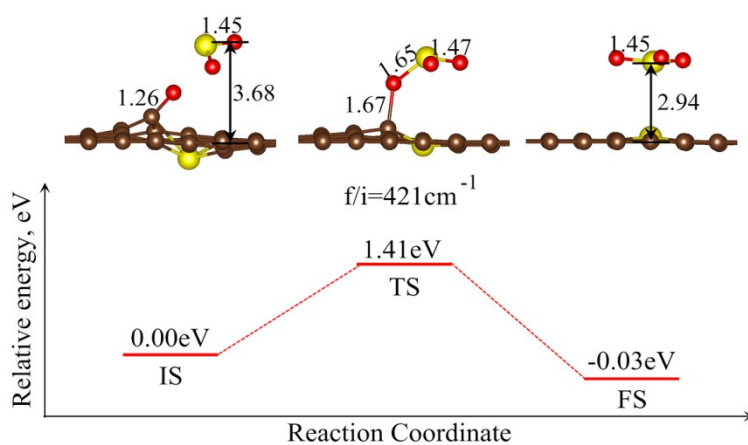

Figure S8 Minimum energy pathway (MEP) for the oxidation of SO<sub>2</sub> by 1O<sub>SG</sub>. All the lengths are given in Å.

Table S1 The main energy barriers ( $E_b$ ) of the O<sub>2</sub> dissociation processes

| Reaction   | O <sub>2</sub> /GP |                 | O <sub>2</sub> /SG |      | O <sub>2</sub> /OG |      |
|------------|--------------------|-----------------|--------------------|------|--------------------|------|
|            | NSP <sup>a</sup>   | SP <sup>b</sup> | NSP                | SP   | NSP                | SP   |
| $E_b$ , eV | 1.78               | 1.59            | 0.39               | 0.19 | 0.05               | 0.04 |
